# Supplementary material for: Overexpression of MTFR1 promotes cancer progression and drug-resistance on cisplatin and is related to the immune microenvironment in lung adenocarcinoma
Source: publisher site journal article supplement (doi:10.18632/aging.205338), 2024-01-02
Supplement: Supplementary file [file aging-v16i1-205338-supplementary-material-SD1.pdf]

**SUPPLEMENTARY FIGURES**

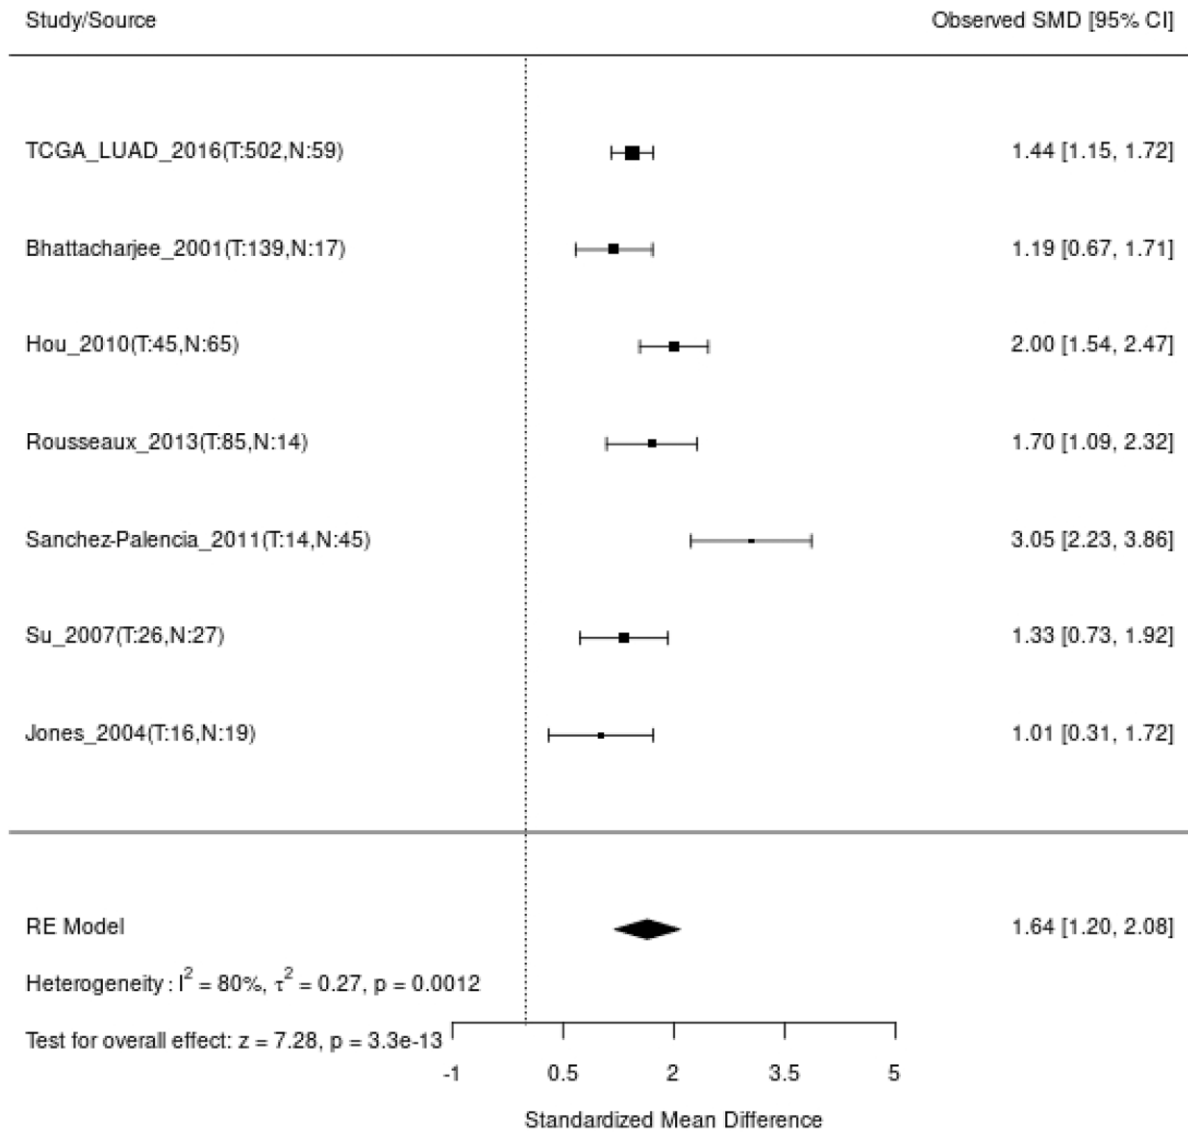

**Supplementary Figure 1. MTFR1 expression in lung tissues using meta-analysis.**

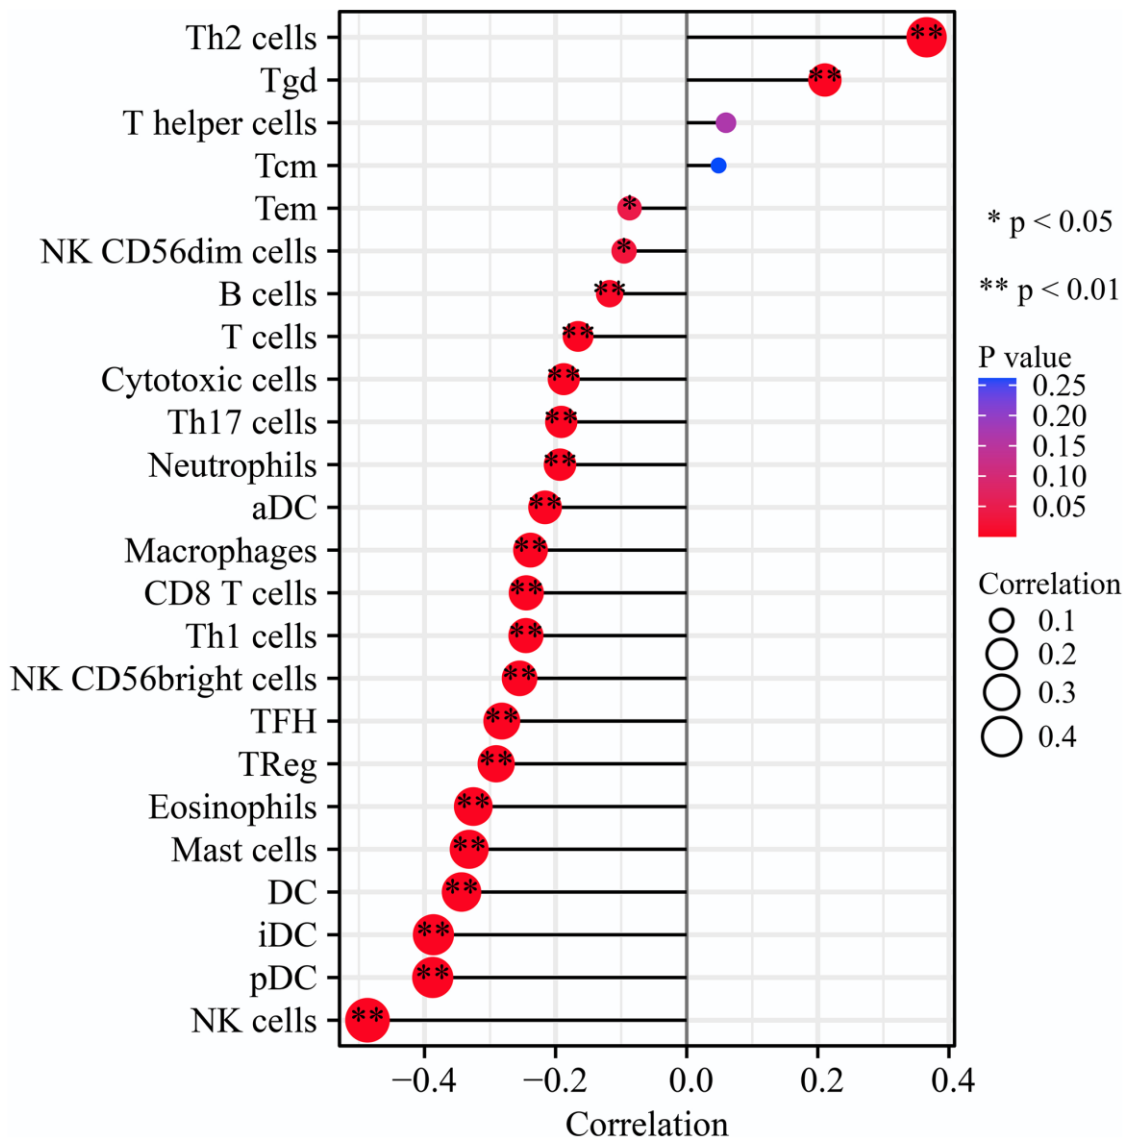

Supplementary Figure 2. MTRF1 expression was related to LAC immune cells in TCGA database.

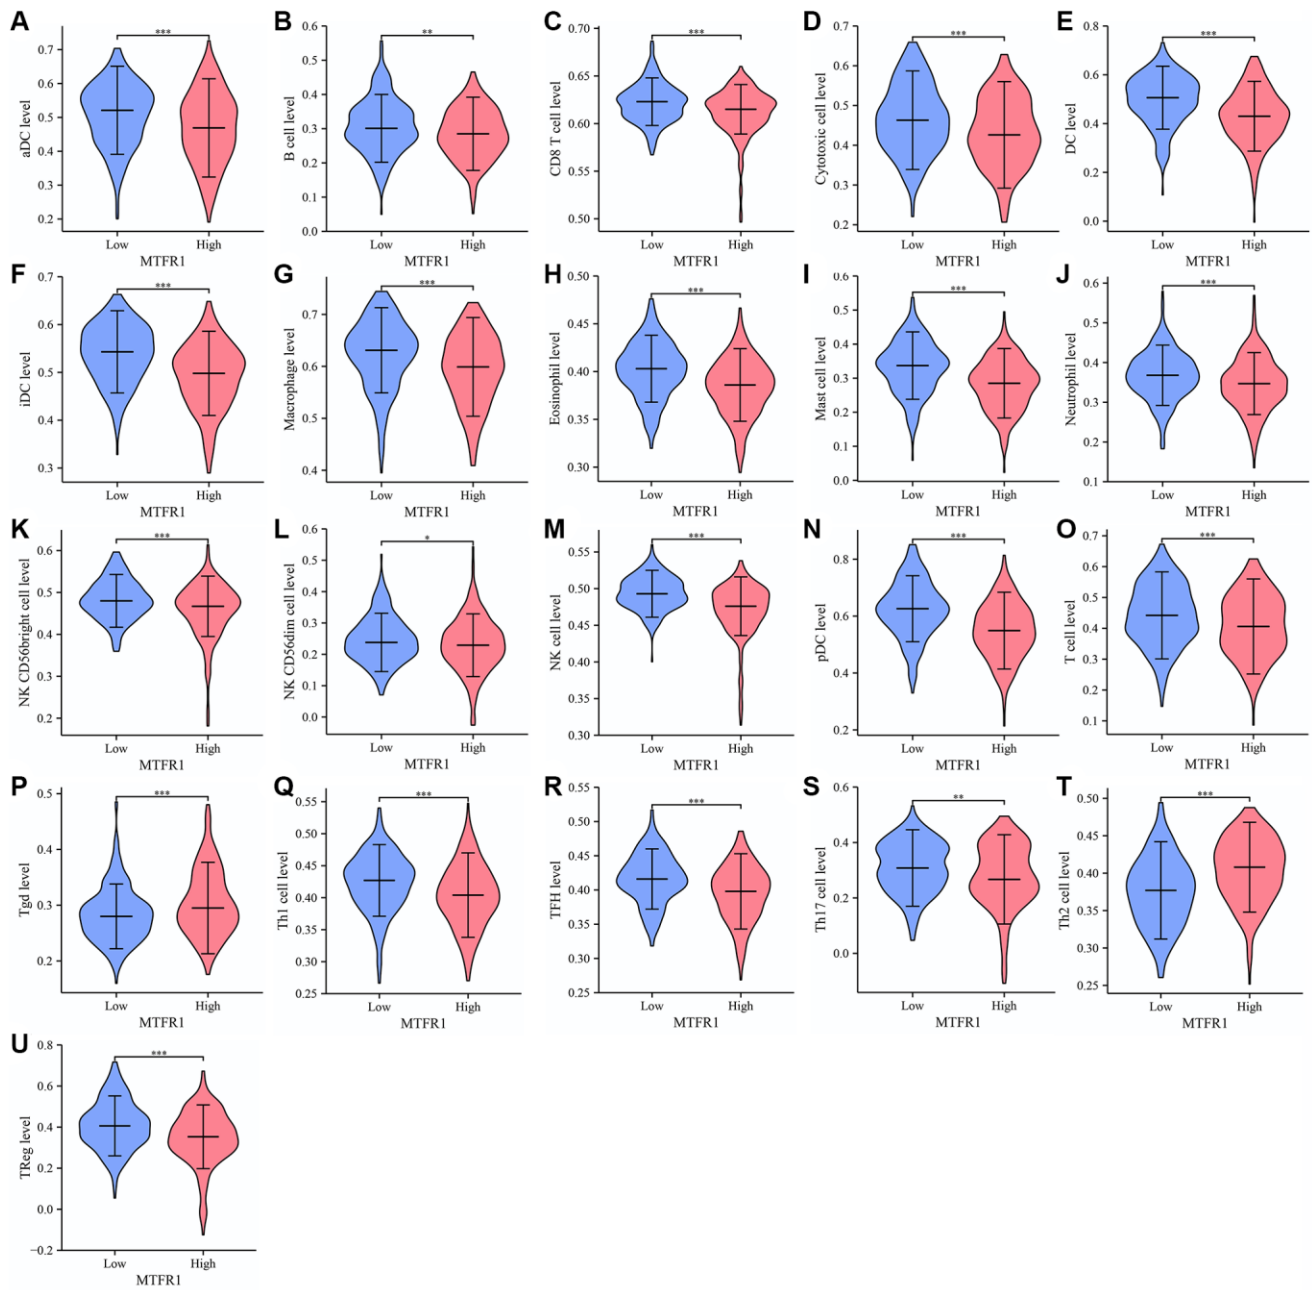

Supplementary Figure 3. The immune cells levels in high- and low- MTFR1 expression.
